# Supplementary material for: CuO/I2-mediated intramolecular annulation for the synthesis of 2-aroyl-3-hydroxy-4-iodonaphthalenes
Source: Royal Society of Chemistry journal article supplement (doi:10.1039/c5ra17651d), 2015-01-01

## Supporting Information Available

### CuO/I<sub>2</sub>-mediated intramolecular annulation for the synthesis of 2-aryl-3-hydroxy-4-iodonaphthalenes

Qun Cai, Yan Yang, Deng-Kui Li, Feng-Cheng Jia, Cheng Xu and An-Xin Wu\*

Key Laboratory of Pesticide & Chemical Biology, Ministry of Education, College of Chemistry, Central  
China Normal University, Wuhan 430079, P. R. China

E-mail: chwuax@mail.ccnu.edu.cn (A. X. Wu)

| Table of Contents                                                                                        | page   |
|----------------------------------------------------------------------------------------------------------|--------|
| 1. General.....                                                                                          | S2     |
| 2. General procedure for synthesis of <b>2</b> and <b>B</b> .....                                        | S2     |
| 3. Spectral data of compounds <b>2</b> and <b>B</b> .....                                                | S2-S5  |
| 4. Molecular structures and crystallographic data of compounds <b>2a</b> , <b>2i</b> and <b>2j</b> ..... | S6-S7  |
| 5. <sup>1</sup> H NMR and <sup>13</sup> C NMR spectra of compounds <b>2</b> and <b>B</b> .....           | S8-S19 |

## 1. General

All substrates and reagents were commercially available and used without further purification. TLC analysis was performed using pre-coated glass plates. Column chromatography was performed using silica gel (200-300 mesh). IR spectra were recorded on a Perkin-Elmer PE-983 infrared spectrometer as KBr pellets with absorption in  $\text{cm}^{-1}$ .  $^1\text{H}$  spectra were recorded in  $\text{CDCl}_3$  600 MHz NMR spectrometers and resonances ( $\delta$ ) are given in parts per million relative to tetramethylsilane. Data are reported as follows: chemical shift, multiplicity (s = singlet, d = doublet, t = triplet, m = multiplet), coupling constants (Hz) and integration.  $^{13}\text{C}$  spectra were recorded in  $\text{CDCl}_3$  100/150 MHz NMR spectrometers and resonances ( $\delta$ ) are given in ppm. HRMS were obtained on a Bruker Apex-Ultra 7.0T FTMS equipped with an electrospray source (ESI). The X-ray crystal structure determination of **2a**, **2i** and **2j** were obtained on a Bruker SMART APEX CCD system. Melting points were determined using XT-4 apparatus and not corrected.

## 2. General procedure for synthesis of 2 (2a as an example)

A mixture of (*Z*)-2-benzylidene-1-phenylbutane-1,3-dione **1a** (1.0 mmol, 1.0 equiv), CuO (3.0 mmol, 3.0 equiv) and  $\text{I}_2$  (2.0 mmol, 2.0 equiv) in 5 mL ethanol at reflux for 36 h, then filter the precipitate and add CuO (3.0 mmol, 3.0 equiv) and  $\text{I}_2$  (2.0 mmol, 2.0 equiv) to mother liquor. Continue refluxing for 12 h till almost completed conversion of the substrates by TLC analysis. Then extract with EtOAc three times ( $3 \times 50$  mL). The extract was washed with 10%  $\text{Na}_2\text{S}_2\text{O}_3$  solution (w/w), dried over anhydrous  $\text{Na}_2\text{SO}_4$  and concentrated in vacuo. The crude product was purified by column chromatography on silica gel (eluent: petroleum ether/EtOAc) to afford the product **2a** as a yellow solid.

### General procedure for synthesis of B

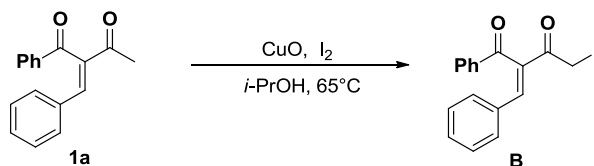

Finely powdered CuO (0.40 g, 5.0 mmol) and  $\text{I}_2$  (1.27 g, 5.0 mmol) were added to a well-stirred soln of (*Z*)-2-benzylidene-1-phenylbutane-1,3-dione **1a** (5.0 mmol) in *i*-PrOH (20 mL). The mixture was stirred for 5 min and then was heated at  $65^\circ\text{C}$  for 10 h. After disappearance of the reactant (TLC), the mixture was filtered and the solvent was removed under reduced pressure (Note: the mixture could not be treated with  $\text{Na}_2\text{S}_2\text{O}_3$  because it reacted with the iodinated product at r.t.), then direct purification of the residue by column chromatography gave the target products in 68% yield.

## 3. Spectral data of compounds 2 and B.

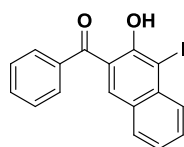

**(3-hydroxy-4-iodonaphthalen-2-yl)(phenyl)methanone (2a)**. Yield 80%; Yellow solid; m.p.  $160.2\text{--}162.8^\circ\text{C}$ ;  $^1\text{H}$  NMR ( $\text{CDCl}_3$ , 600 MHz):  $\delta$  12.25 (s, 1H), 8.18 (s, 1H), 8.13 (d,  $J = 8.4$  Hz, 1H), 7.76 (d,  $J = 7.2$  Hz, 2H), 7.71–7.64 (m, 3H), 7.57 (d,  $J = 7.2$  Hz, 2H), 7.38 (t,  $J = 7.8$  Hz, 1H);  $^{13}\text{C}$  NMR ( $\text{CDCl}_3$ , 150 MHz):  $\delta$  201.1, 156.7, 138.6, 137.5, 137.3, 132.6, 131.5, 130.7, 130.2, 129.6, 128.6,

127.4, 124.7, 120.3, 86.9; IR (KBr): 1630, 1345, 1287, 1242  $\text{cm}^{-1}$ ; HRMS (ESI):  $m/z$   $[\text{M} + \text{H}]^+$  calcd for  $\text{C}_{17}\text{H}_{12}\text{IO}_2$ : 374.9877; found: 374.9873.

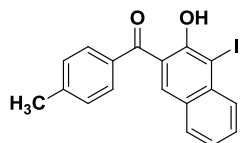

**(3-hydroxy-4-iodonaphthalen-2-yl)(p-tolyl)methanone (2b).** Yield 62%; Yellow solid; m.p. 147.3–148.8  $^{\circ}\text{C}$ ;  $^1\text{H}$  NMR ( $\text{CDCl}_3$ , 600 MHz):  $\delta$  12.26 (s, 1H), 8.19 (s, 1H), 8.13 (d,  $J = 8.4$  Hz, 1H), 7.71–7.64 (m, 4H), 7.39–7.35 (m, 3H), 2.49 (s, 3H);  $^{13}\text{C}$  NMR ( $\text{CDCl}_3$ , 100 MHz):  $\delta$  200.7, 156.8, 143.7, 138.5, 137.3, 134.6, 131.4, 130.7, 130.1, 129.9, 129.3, 127.4, 124.7, 120.5, 86.8, 21.7; IR (KBr): 1630, 1341, 1322, 1283  $\text{cm}^{-1}$ ; HRMS (ESI):  $m/z$   $[\text{M} + \text{H}]^+$  calcd for  $\text{C}_{18}\text{H}_{14}\text{IO}_2$ : 389.0033; found: 389.0033.

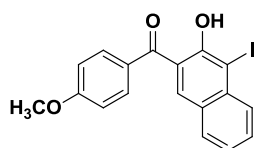

**(3-hydroxy-4-iodonaphthalen-2-yl)(4-methoxyphenyl)methanone (2c).** Yield 65%; Yellow solid; m.p. 112.4–113.4  $^{\circ}\text{C}$ ;  $^1\text{H}$  NMR ( $\text{CDCl}_3$ , 600 MHz):  $\delta$  12.17 (s, 1H), 8.18 (s, 1H), 8.13 (d,  $J = 7.8$  Hz, 1H), 7.79 (d,  $J = 8.4$  Hz, 2H), 7.72 (d,  $J = 7.8$  Hz, 1H), 7.64 (t,  $J = 7.8$  Hz, 1H), 7.38 (t,  $J = 7.8$  Hz, 1H), 7.04 (d,  $J = 7.8$  Hz, 2H), 3.93 (s, 3H);  $^{13}\text{C}$  NMR ( $\text{CDCl}_3$ , 100 MHz):  $\delta$  199.3, 163.5, 156.6, 138.3, 136.8, 132.3, 131.2, 130.7, 130.1, 129.7, 127.4, 124.6, 120.7, 113.9, 86.7, 55.6; IR (KBr): 1632, 1605, 1329, 1263, 1176  $\text{cm}^{-1}$ ; HRMS (ESI):  $m/z$   $[\text{M} + \text{H}]^+$  calcd for  $\text{C}_{18}\text{H}_{14}\text{IO}_3$ : 404.9982; found: 404.9986.

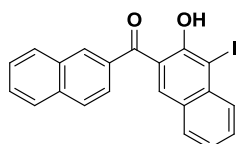

**(3-hydroxy-4-iodonaphthalen-2-yl)(naphthalen-2-yl)methanone (2d).** Yield 57%; Yellow solid; m.p. 173.3–175.8  $^{\circ}\text{C}$ ;  $^1\text{H}$  NMR ( $\text{CDCl}_3$ , 600 MHz):  $\delta$  12.25 (s, 1H), 8.25–8.24 (m, 2H), 8.15 (d,  $J = 8.4$  Hz, 1H), 8.02 (d,  $J = 8.4$  Hz, 1H), 7.97–7.95 (m, 2H), 7.85 (d,  $J = 8.4$  Hz, 1H), 7.69–7.65 (m, 3H), 7.61 (t,  $J = 7.8$  Hz, 1H), 7.38 (t,  $J = 7.8$  Hz, 1H);  $^{13}\text{C}$  NMR ( $\text{CDCl}_3$ , 100 MHz):  $\delta$  200.9, 156.7, 138.6, 137.5, 135.1, 134.5, 132.1, 131.5, 131.2, 130.7, 130.2, 129.3, 128.6, 127.9, 127.5, 127.2, 125.4, 124.7, 120.6, 86.9; IR (KBr): 1635, 1286  $\text{cm}^{-1}$ ; HRMS (ESI):  $m/z$   $[\text{M} + \text{H}]^+$  calcd for  $\text{C}_{21}\text{H}_{14}\text{IO}_2$ : 425.0033; found: 425.0028.

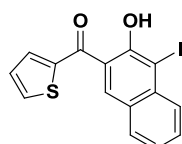

**(3-hydroxy-4-iodonaphthalen-2-yl)(thiophen-2-yl)methanone (2e).** Yield 51%; Yellow solid; m.p. 158.7–160.4  $^{\circ}\text{C}$ ;  $^1\text{H}$  NMR ( $\text{CDCl}_3$ , 600 MHz):  $\delta$  11.73 (s, 1H), 8.49 (s, 1H), 8.13 (d,  $J = 8.4$  Hz, 1H), 7.84 (d,  $J = 5.4$  Hz, 1H), 7.81–7.79 (m, 2H), 7.67 (t,  $J = 7.8$  Hz, 1H), 7.42 (t,  $J = 7.2$  Hz, 1H),

7.27–7.26 (m, 1H);  $^{13}\text{C}$  NMR ( $\text{CDCl}_3$ , 100 MHz):  $\delta$  190.6, 155.9, 141.7, 138.3, 135.5, 135.4, 135.1, 131.3, 130.8, 130.1, 128.2, 127.6, 124.8, 120.8, 86.9; IR (KBr): 1628, 1571, 1411, 1287, 1232, 1222  $\text{cm}^{-1}$ ; HRMS (ESI):  $m/z$   $[\text{M} + \text{Na}]^+$  calcd for  $\text{C}_{15}\text{H}_9\text{INaO}_2\text{S}$ : 402.9260; found: 402.9264.

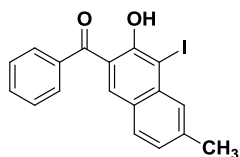

**(3-hydroxy-4-iodo-6-methylnaphthalen-2-yl)(phenyl)methanone (2f).** Yield 72%; Yellow solid; m.p. 167.4–168.9 °C;  $^1\text{H}$  NMR ( $\text{CDCl}_3$ , 600 MHz):  $\delta$  12.35 (s, 1H), 8.11 (s, 1H), 7.89 (s, 1H), 7.74 (d,  $J = 7.8$  Hz, 2H), 7.66 (t,  $J = 7.8$  Hz, 1H), 7.58–7.54 (m, 3H), 7.19 (d,  $J = 8.4$  Hz, 1H), 2.57 (s, 3H);  $^{13}\text{C}$  NMR ( $\text{CDCl}_3$ , 100 MHz):  $\delta$  201.0, 156.9, 142.4, 138.7, 137.4, 137.3, 132.4, 130.1, 129.7, 129.5, 128.5, 127.1, 125.7, 119.5, 86.1, 22.3; IR (KBr): 1629, 1444, 1341, 1309, 1283  $\text{cm}^{-1}$ ; HRMS (ESI):  $m/z$   $[\text{M} + \text{H}]^+$  calcd for  $\text{C}_{18}\text{H}_{14}\text{IO}_2$ : 389.0033; found: 389.0035.

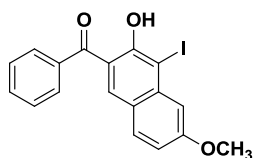

**(3-hydroxy-4-iodo-6-methoxynaphthalen-2-yl)(phenyl)methanone (2g).** Yield 68%; Yellow solid; m.p. 138.1–138.9 °C;  $^1\text{H}$  NMR ( $\text{CDCl}_3$ , 600 MHz):  $\delta$  12.59 (s, 1H), 8.05 (s, 1H), 7.73 (d,  $J = 8.4$  Hz, 2H), 7.65 (t,  $J = 7.8$  Hz, 1H), 7.58–7.53 (m, 3H), 7.39 (s, 1H), 6.97 (d,  $J = 9.0$  Hz, 1H), 4.00 (s, 3H);  $^{13}\text{C}$  NMR ( $\text{CDCl}_3$ , 100 MHz):  $\delta$  200.8, 162.6, 157.8, 140.8, 137.5, 137.2, 132.3, 132.2, 129.4, 128.5, 122.6, 118.0, 117.8, 109.4, 85.5, 55.6; IR (KBr): 1635, 1500, 1341, 1312, 1228  $\text{cm}^{-1}$ ; HRMS (ESI):  $m/z$   $[\text{M} + \text{H}]^+$  calcd for  $\text{C}_{18}\text{H}_{14}\text{IO}_3$ : 404.9982; found: 404.9977.

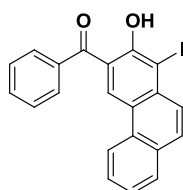

**(2-hydroxy-1-iodophenanthren-3-yl)(phenyl)methanone (2h).** Yield 59%; Yellow solid; m.p. 166.2–167.9 °C;  $^1\text{H}$  NMR ( $\text{CDCl}_3$ , 600 MHz):  $\delta$  12.66 (s, 1H), 8.79 (s, 1H), 8.09 (d,  $J = 7.8$  Hz, 1H), 7.96 (d,  $J = 9.6$  Hz, 1H), 7.76–7.75 (m, 3H), 7.72–7.67 (m, 2H), 7.57 (t,  $J = 7.2$  Hz, 2H), 7.52–7.48 (m, 2H);  $^{13}\text{C}$  NMR ( $\text{CDCl}_3$ , 100 MHz):  $\delta$  200.8, 158.4, 138.4, 137.3, 132.8, 132.6, 130.6, 130.3, 130.2, 129.7, 129.5, 128.9, 128.5, 127.9, 126.6, 123.3, 121.6, 118.4, 89.5; IR (KBr): 1615, 1402  $\text{cm}^{-1}$ ; HRMS (ESI):  $m/z$   $[\text{M} + \text{H}]^+$  calcd for  $\text{C}_{21}\text{H}_{14}\text{IO}_2$ : 425.0033; found: 425.0034.

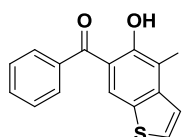

**(5-hydroxy-4-iodobenzo[b]thiophen-6-yl)(phenyl)methanone (2i).** Yield 43%; Yellow solid; m.p. 133.4–134.6 °C;  $^1\text{H}$  NMR ( $\text{CDCl}_3$ , 600 MHz):  $\delta$  12.66 (s, 1H), 8.07 (s, 1H), 7.77 (d,  $J = 5.4$  Hz, 1H),

7.70 (d,  $J = 7.8$  Hz, 2H), 7.64 (t,  $J = 7.2$  Hz, 1H), 7.54 (t,  $J = 7.8$  Hz, 2H), 7.44 (d,  $J = 5.4$  Hz, 1H);  $^{13}\text{C}$  NMR ( $\text{CDCl}_3$ , 150 MHz):  $\delta$  200.8, 158.1, 148.6, 137.4, 134.3, 132.3, 129.3, 129.0, 128.7, 128.6, 128.1, 117.4, 80.3; IR (KBr): 1618, 1388, 1332, 1263, 1235  $\text{cm}^{-1}$ ; HRMS (ESI):  $m/z$   $[\text{M} + \text{H}]^+$  calcd for  $\text{C}_{15}\text{H}_{10}\text{IO}_2\text{S}$ : 380.9441; found: 380.9435.

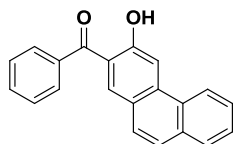

**(3-hydroxyphenanthren-2-yl)(phenyl)methanone (2j).** Yield 85%; Yellow solid; m.p. 140.1–141.1  $^{\circ}\text{C}$ ;  $^1\text{H}$  NMR ( $\text{CDCl}_3$ , 600 MHz):  $\delta$  11.63 (s, 1H), 8.59 (bs, 1H), 8.21 (s, 1H), 8.13 (s, 1H), 7.82 (d,  $J = 3.0$  Hz, 1H), 7.79 (d,  $J = 7.2$  Hz, 2H), 7.67–7.64 (m, 3H), 7.58–7.53 (m, 4H);  $^{13}\text{C}$  NMR ( $\text{CDCl}_3$ , 150 MHz):  $\delta$  201.4, 159.5, 137.9, 136.6, 135.5, 133.5, 132.2, 129.5, 128.7, 128.55, 128.47, 126.9, 126.7, 125.2, 124.7, 123.9, 119.6, 109.7; IR (KBr): 1641, 1332, 1211  $\text{cm}^{-1}$ ; HRMS (ESI):  $m/z$   $[\text{M} + \text{H}]^+$  calcd for  $\text{C}_{21}\text{H}_{15}\text{O}_2$ : 299.1067; found: 299.1067.

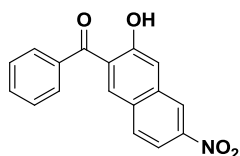

**(3-hydroxy-6-nitronaphthalen-2-yl)(phenyl)methanone (2k).** Yield 38%; Yellow solid; m.p. 144.8–146.3  $^{\circ}\text{C}$ ;  $^1\text{H}$  NMR ( $\text{CDCl}_3$ , 600 MHz):  $\delta$  11.16 (s, 1H), 8.63 (s, 1H), 8.27 (s, 1H), 8.04 (d,  $J = 9.0$  Hz, 1H), 7.89 (d,  $J = 9.0$  Hz, 1H), 7.79 (d,  $J = 7.8$  Hz, 2H), 7.71 (t,  $J = 7.2$  Hz, 1H), 7.61–7.58 (m, 3H);  $^{13}\text{C}$  NMR ( $\text{CDCl}_3$ , 100 MHz):  $\delta$  201.3, 158.5, 148.0, 137.2, 136.3, 135.9, 132.9, 131.2, 129.6, 128.7, 128.6, 123.5, 122.6, 117.2, 114.7; IR (KBr): 1643, 1531, 1342, 1294, 1215  $\text{cm}^{-1}$ ; HRMS (ESI):  $m/z$   $[\text{M} + \text{H}]^+$  calcd for  $\text{C}_{17}\text{H}_{12}\text{NO}_4$ : 294.0761; found: 294.0754.

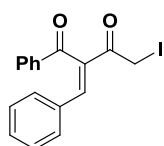

**(E)-2-benzylidene-4-iodo-1-phenylbutane-1,3-dione (B).** Yield 68%; Yellow solid; m.p. 120.1–121.8  $^{\circ}\text{C}$ ;  $^1\text{H}$  NMR ( $\text{CDCl}_3$ , 600 MHz):  $\delta$  7.98 (s, 1H), 7.95 (d,  $J = 7.8$  Hz, 2H), 7.52 (t,  $J = 7.2$  Hz, 1H), 7.38 (t,  $J = 7.8$  Hz, 2H), 7.32 (t,  $J = 7.8$  Hz, 2H), 7.29–7.24 (m, 1H), 7.22 (t,  $J = 7.8$  Hz, 2H), 4.20 (s, 2H);  $^{13}\text{C}$  NMR ( $\text{CDCl}_3$ , 150 MHz):  $\delta$  196.9, 190.6, 143.6, 135.8, 135.7, 134.1, 132.5, 130.8, 130.5, 129.4, 128.8, 128.7, 2.3; IR (KBr): 3450, 3050, 1668, 1639, 1616, 1325, 1259, 1234, 915, 750, 689  $\text{cm}^{-1}$ ; HRMS (ESI):  $m/z$   $[\text{M} + \text{Na}]^+$  calcd for  $\text{C}_{17}\text{H}_{13}\text{INaO}_2$ : 398.9852; found: 398.9858.

#### 4. Molecular structure and crystallographic data of compounds 2a, 2i and 2j.

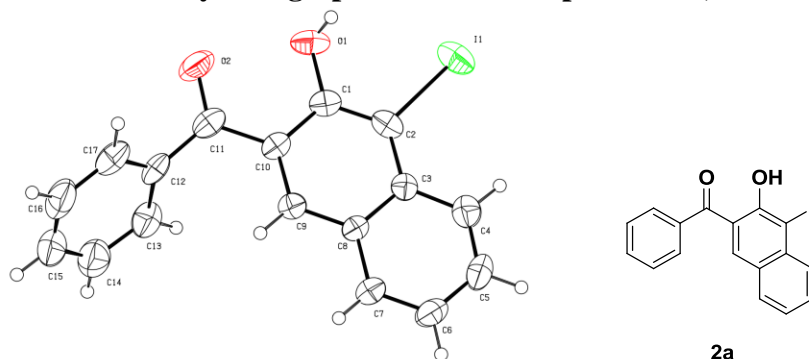

**Figure S1** X-ray crystal structure of compounds **2a**

Crystal Data for Compound **2a**:  $C_{17}H_{11}IO_2$ , MW = 374.16, monoclinic,  $a = 11.327(4)$  Å,  $b = 11.780(5)$  Å,  $c = 10.747(4)$  Å,  $\alpha = 90.00^\circ$ ,  $\beta = 94.540(4)^\circ$ ,  $\gamma = 90.00^\circ$ ,  $V = 1429.5(9)$  Å<sup>3</sup>,  $T = 296(2)$  K, space group  $P2(1)/c$ ,  $Z = 4$ ,  $m(\text{Mo-K}\alpha) = 2.238$  mm<sup>-1</sup>, 6008 reflections collected, 2592 unique [ $R(\text{int}) = 0.0273$ ] which were used in all calculations. The final  $wR2$  ( $F2$ ) was 0.0771. CCDC 986777 contains the supplementary crystallographic data for this paper. These data can be obtained free of charge from The Cambridge Crystallographic Data Centre.

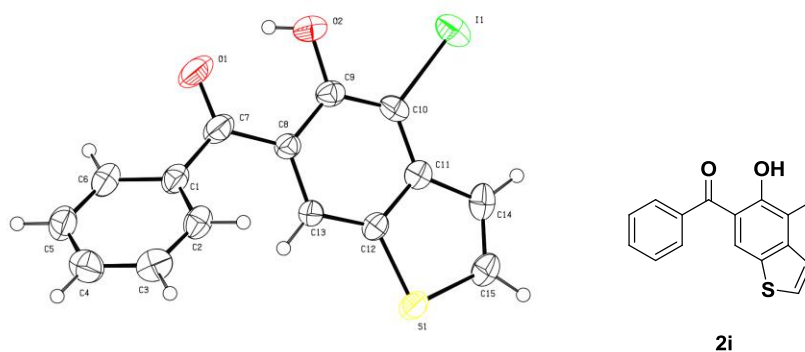

**Figure S2** X-ray crystal structure of compounds **2i**

Crystal Data for Compound **2i**:  $C_{15}H_9IO_2S$ , MW = 380.18, orthorhombic,  $a = 16.603(3)$  Å,  $b = 4.1488(8)$  Å,  $c = 19.295(4)$  Å,  $\alpha = 90.00^\circ$ ,  $\beta = 90.00^\circ$ ,  $\gamma = 90.00^\circ$ ,  $V = 1329.1(4)$  Å<sup>3</sup>,  $T = 296(2)$  K, space group  $Pna2(1)$ ,  $Z = 4$ ,  $m(\text{Mo-K}\alpha) = 2.560$  mm<sup>-1</sup>, 6961 reflections collected, 2584 unique [ $R(\text{int}) = 0.0590$ ] which were used in all calculations. The final  $wR2$  ( $F2$ ) was 0.0872. CCDC 986778 contains the supplementary crystallographic data for this paper. These data can be obtained free of charge from The Cambridge Crystallographic Data Centre.

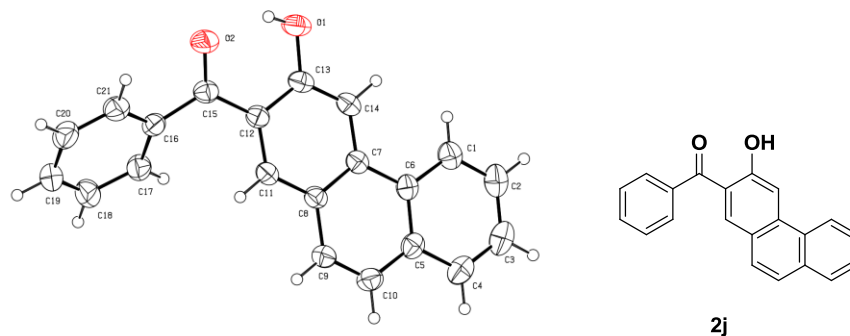

**Figure S3** X-ray crystal structure of compounds **2j**

Crystal Data for Compound **2j**:  $C_{21}H_{14}O_2$ , MW = 298.32, monoclinic,  $a = 13.966(2) \text{ \AA}$ ,  $b = 12.7793(19) \text{ \AA}$ ,  $c = 8.4353(13) \text{ \AA}$ ,  $\alpha = 90.00^\circ$ ,  $\beta = 100.374(2)^\circ$ ,  $\gamma = 90.00^\circ$ ,  $V = 1480.9(4) \text{ \AA}^3$ ,  $T = 296(2) \text{ K}$ , space group  $P2(1)/c$ ,  $Z = 4$ ,  $m(\text{Mo-K}\alpha) = 0.085 \text{ mm}^{-1}$ , 7985 reflections collected, 2741 unique [ $R(\text{int}) = 0.0236$ ] which were used in all calculations. The final  $wR2 (F2)$  was 0.1291. CCDC 986779 contains the supplementary crystallographic data for this paper. These data can be obtained free of charge from The Cambridge Crystallographic Data Centre.

5.  $^1\text{H}$  NMR and  $^{13}\text{C}$  NMR spectra of compounds 2 and B.

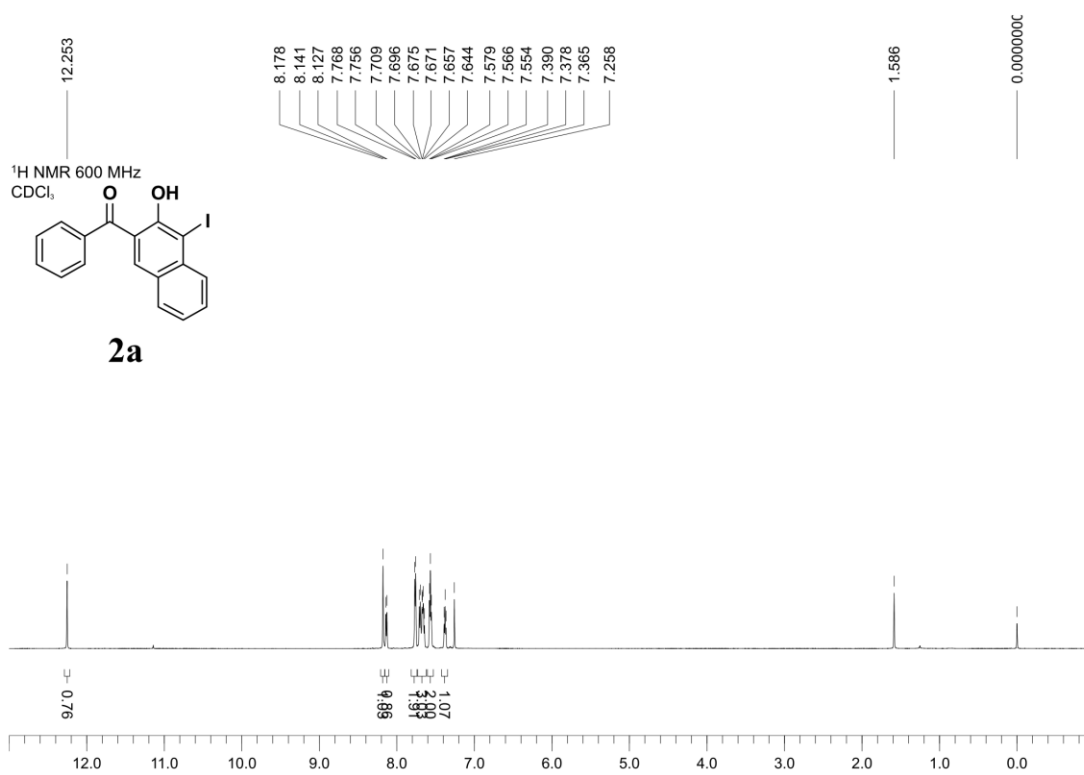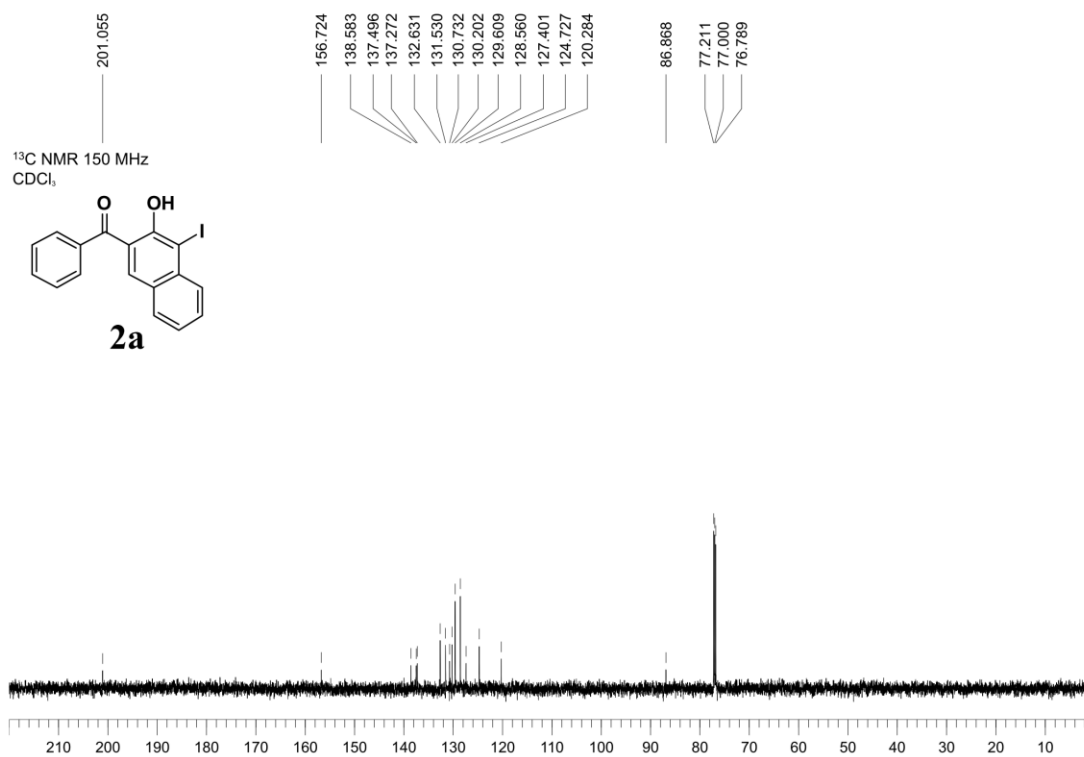



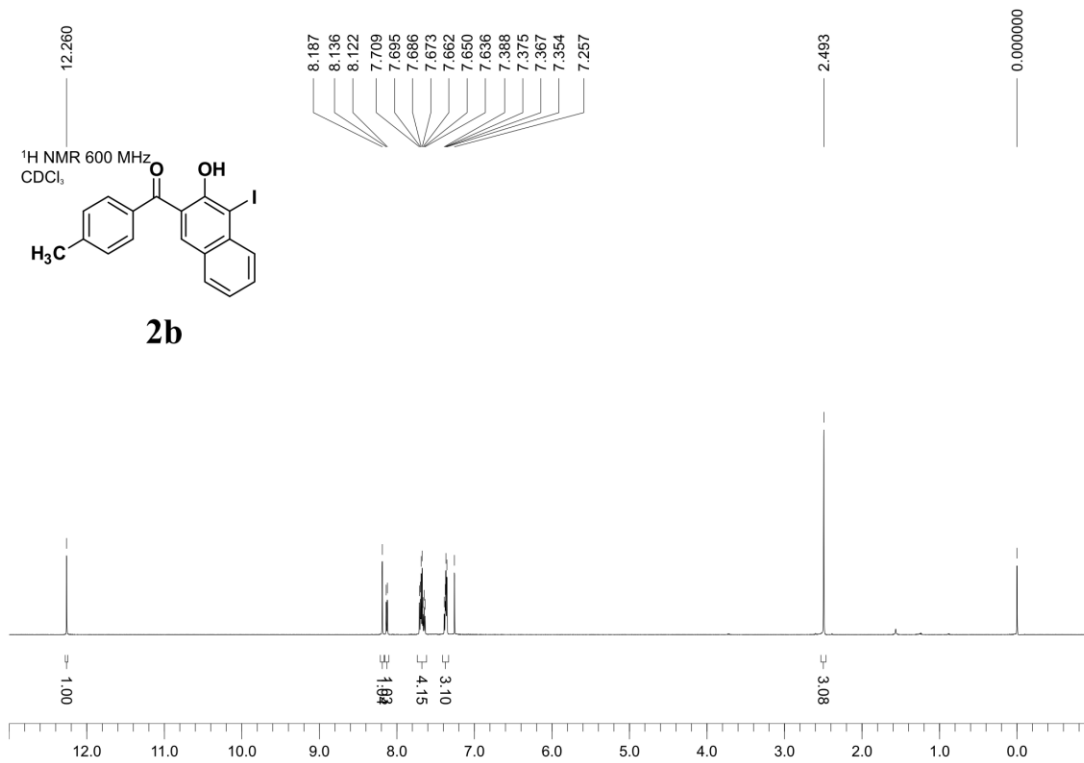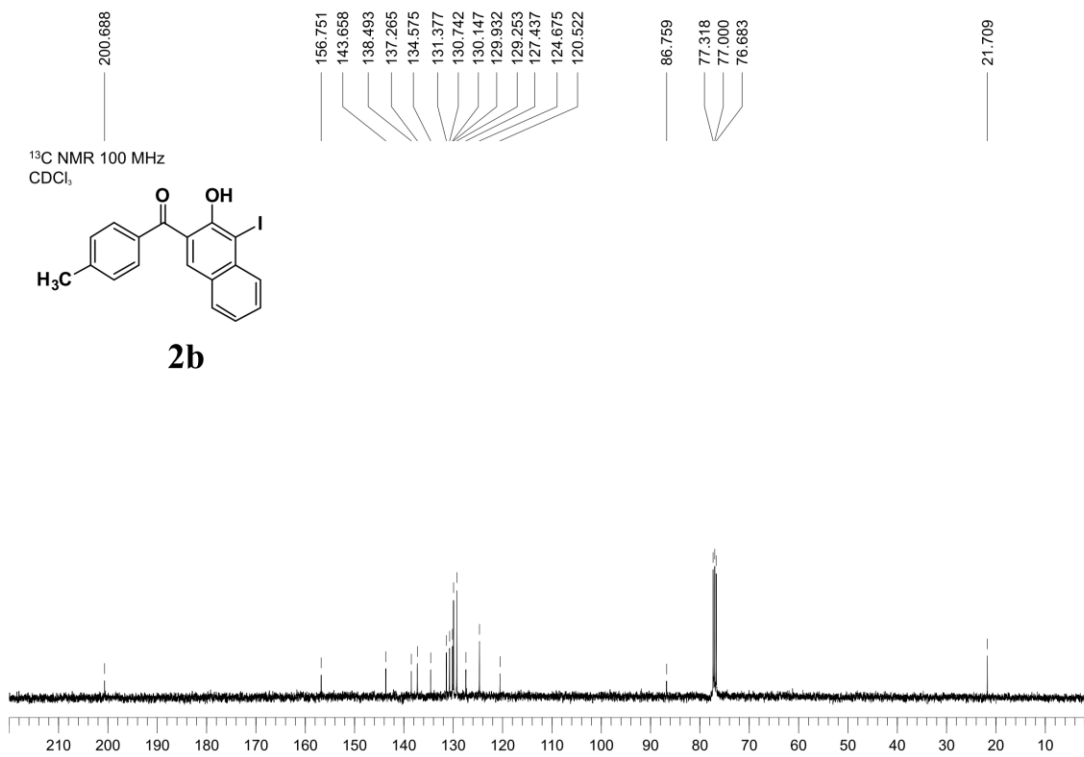

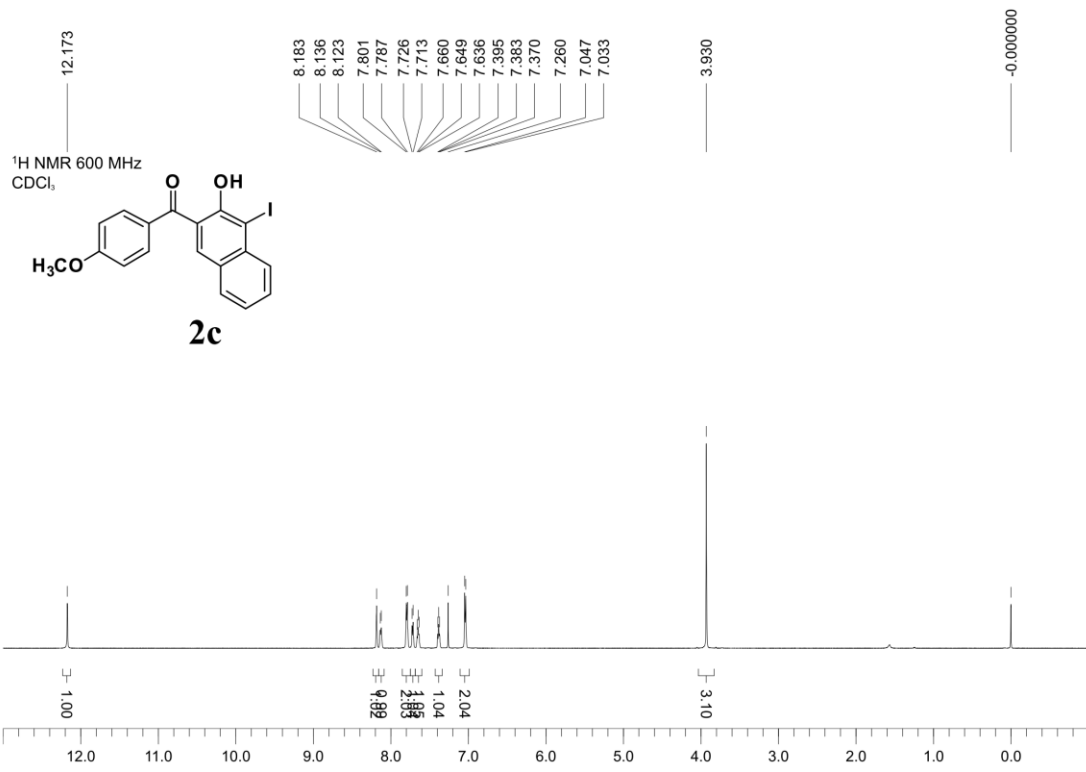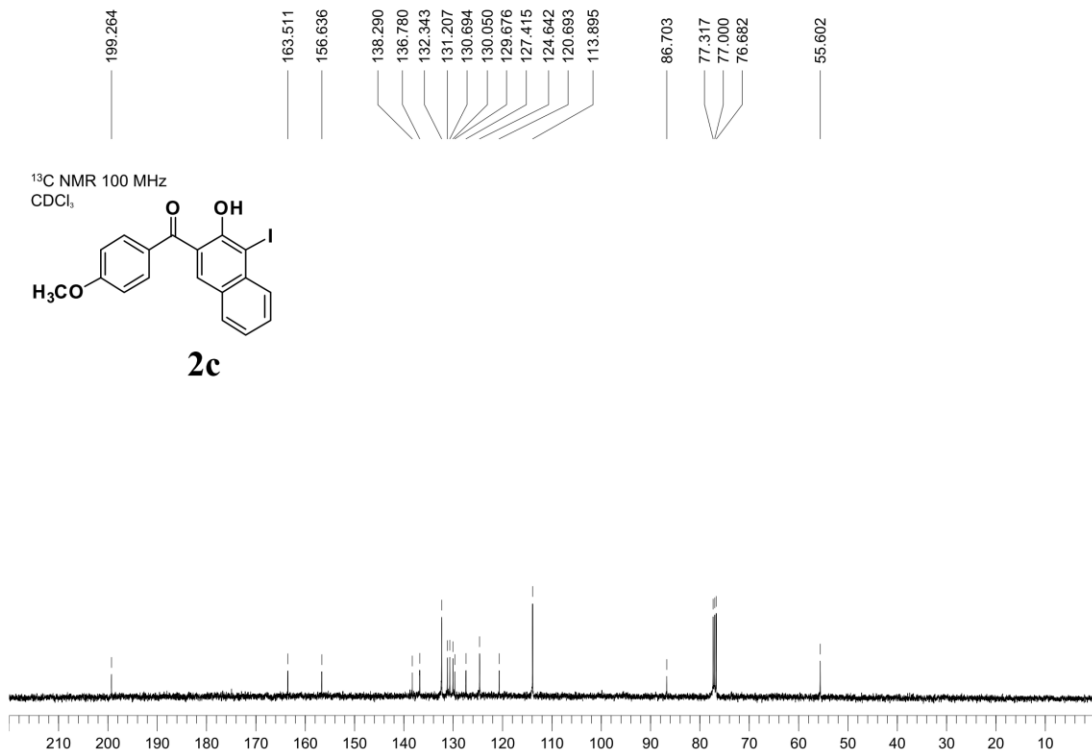

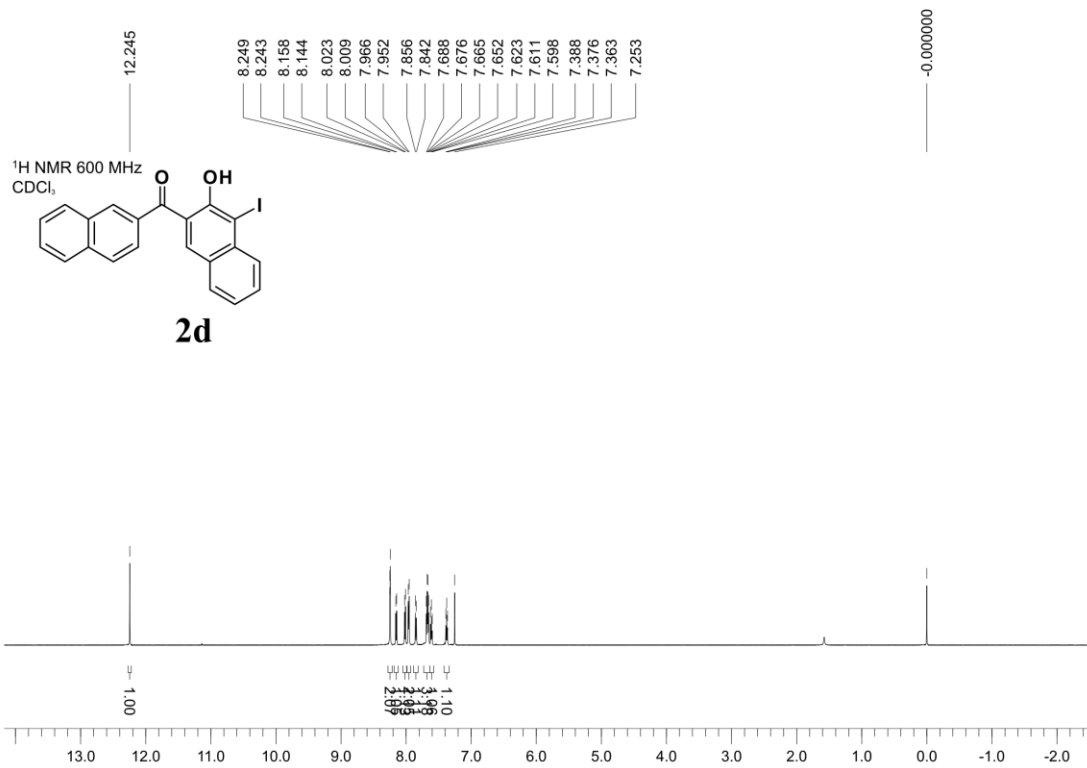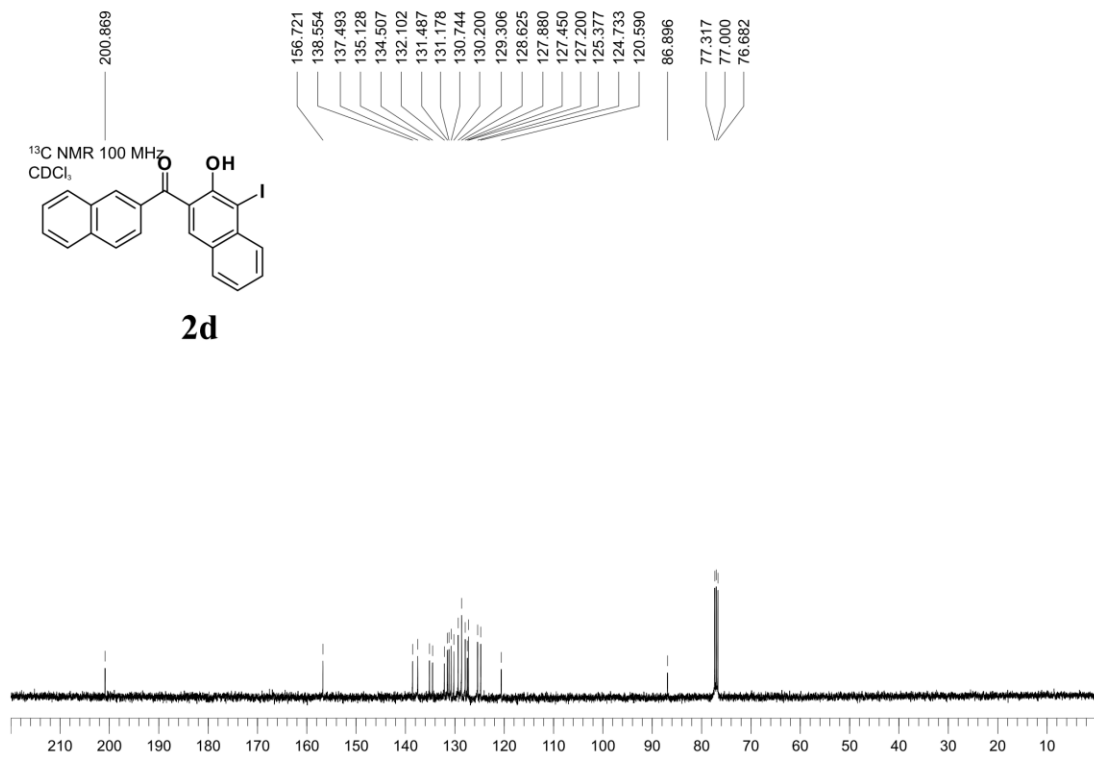

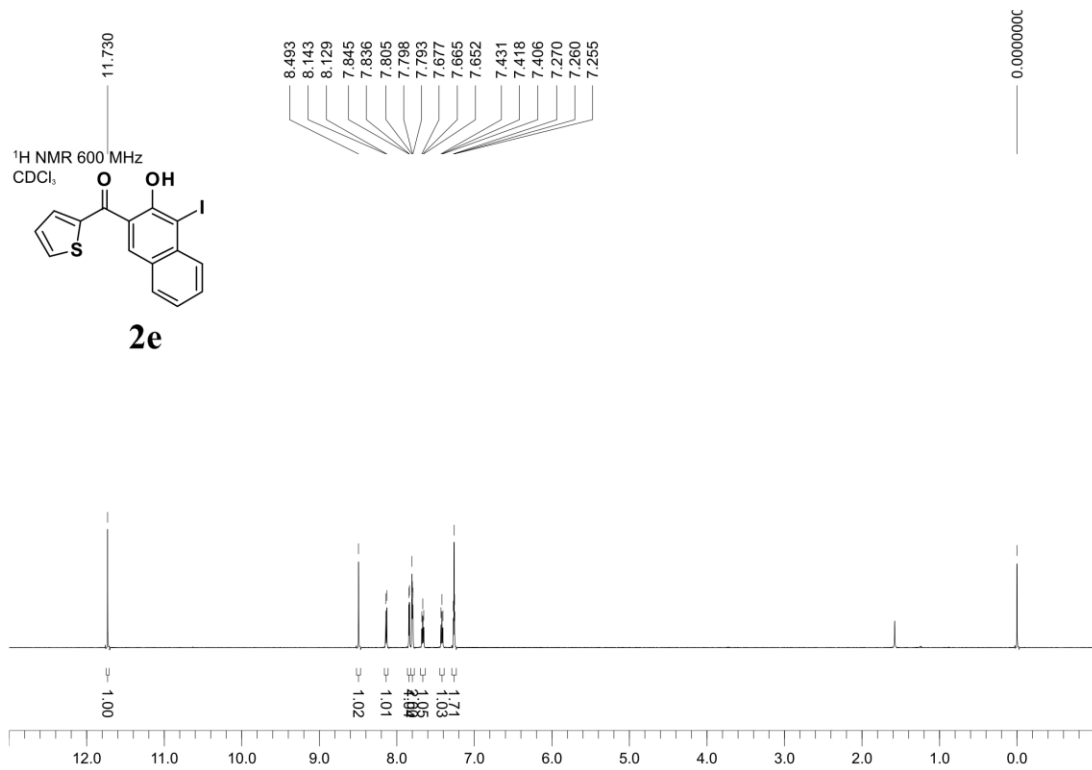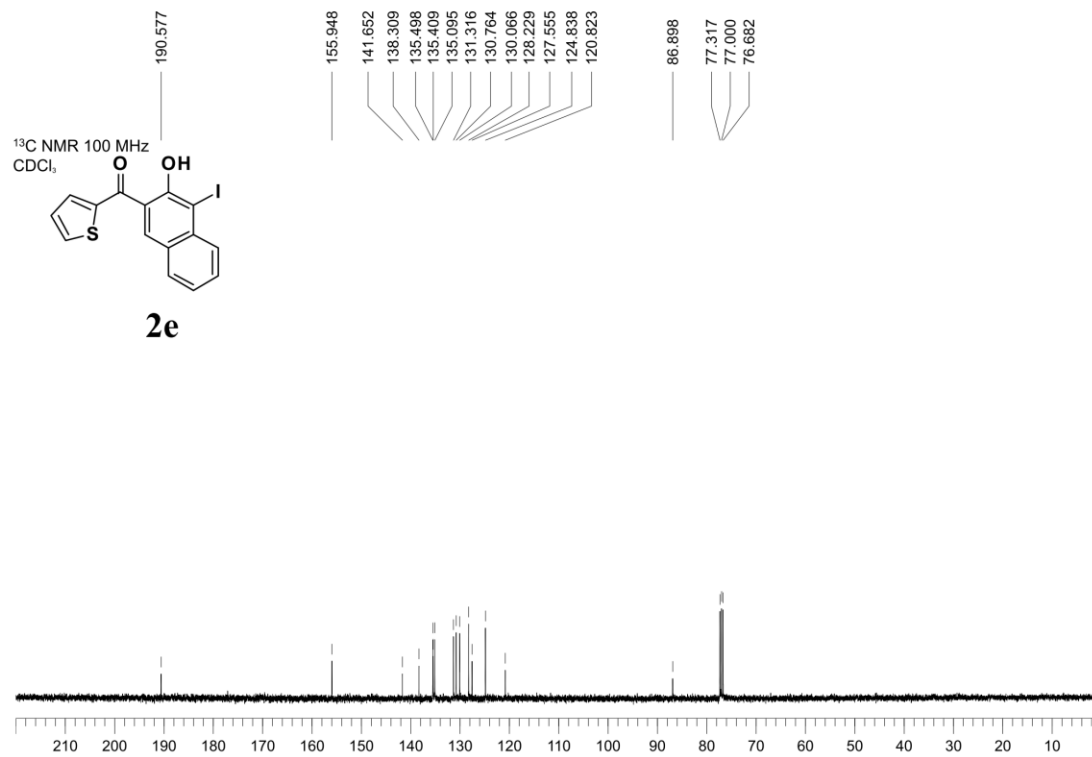

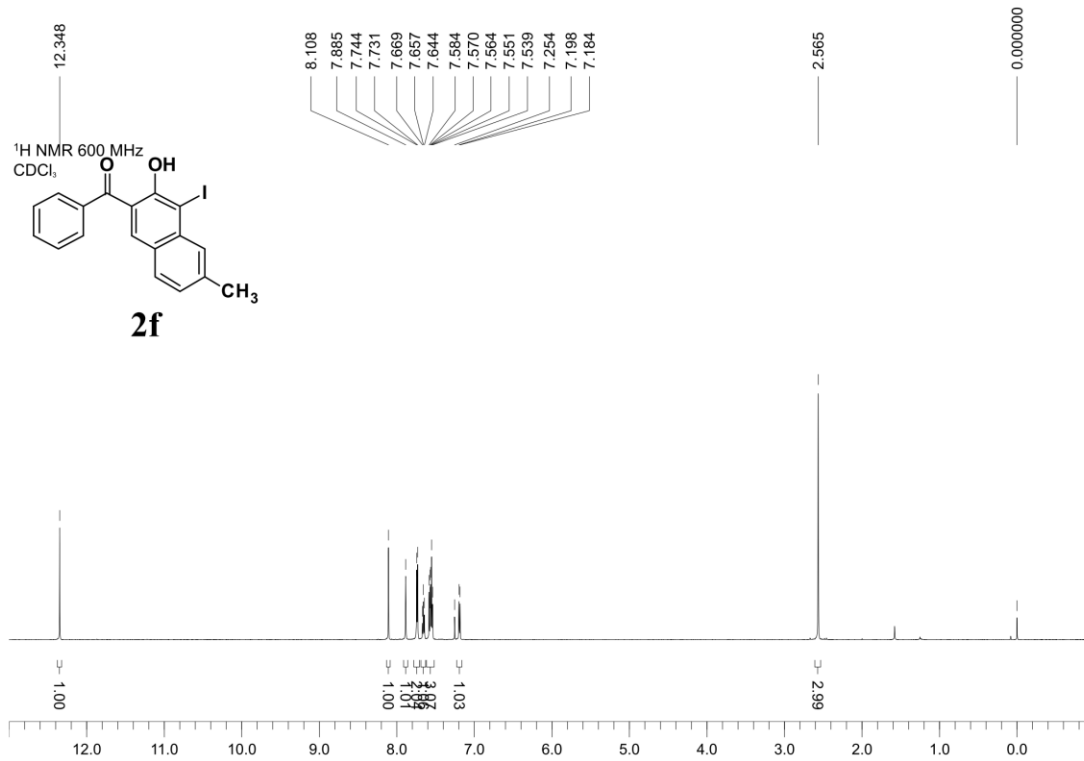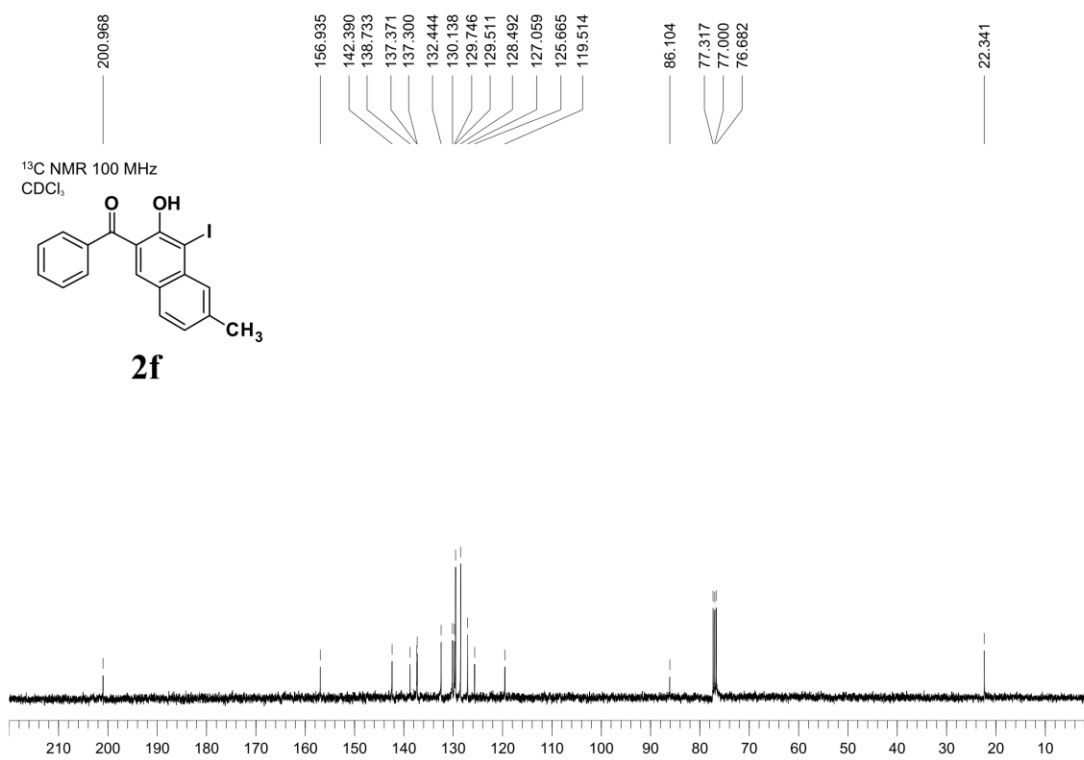

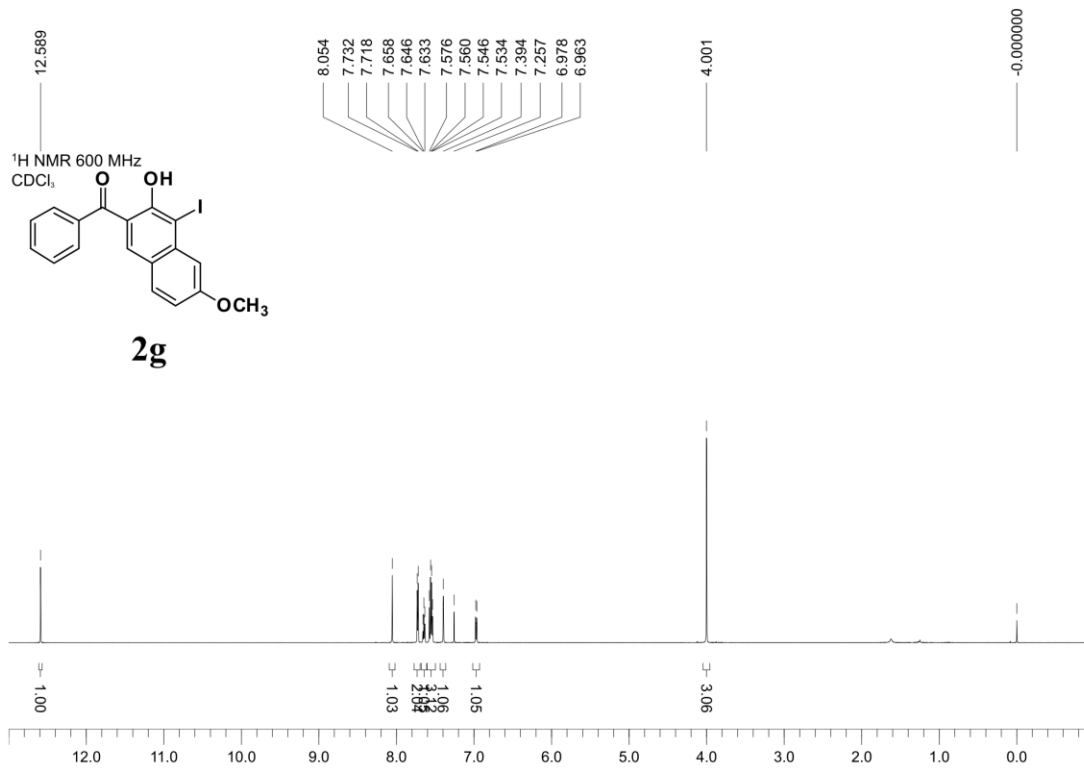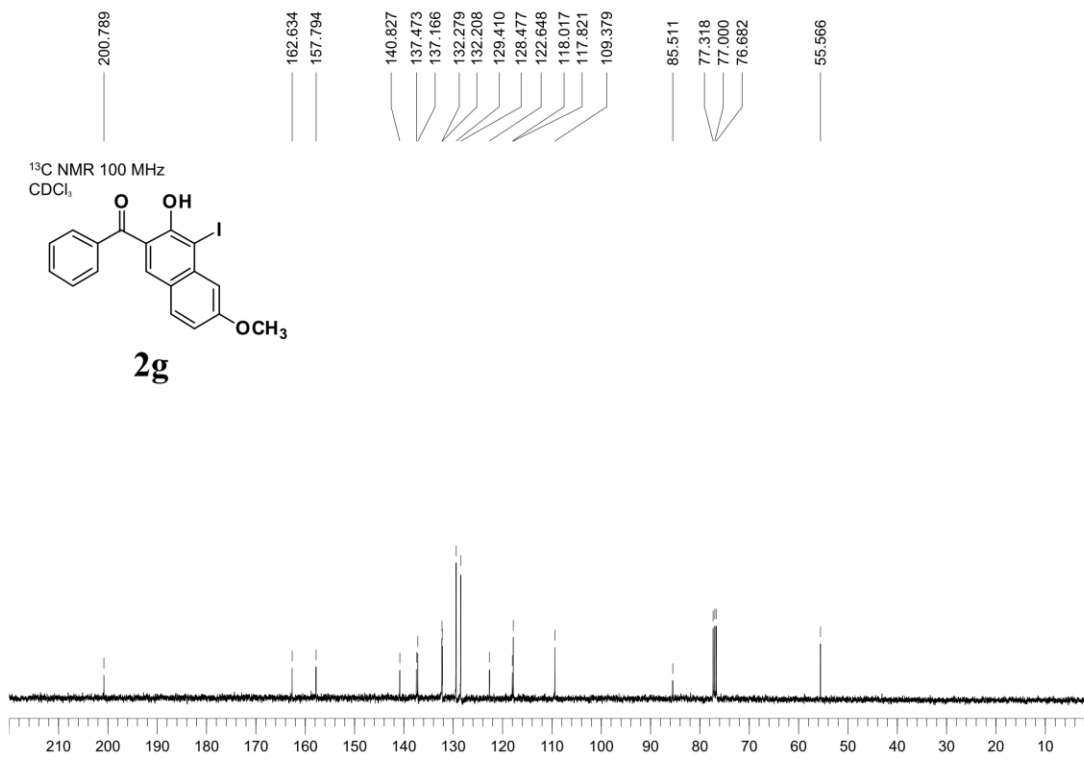

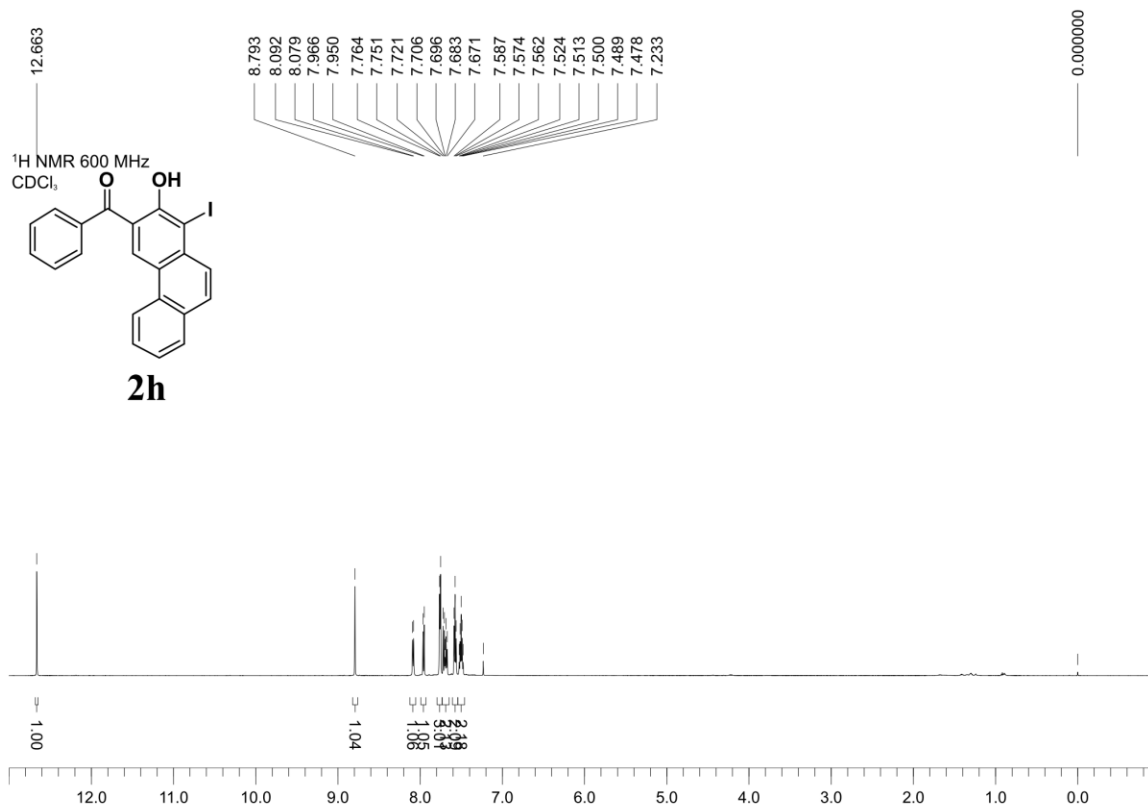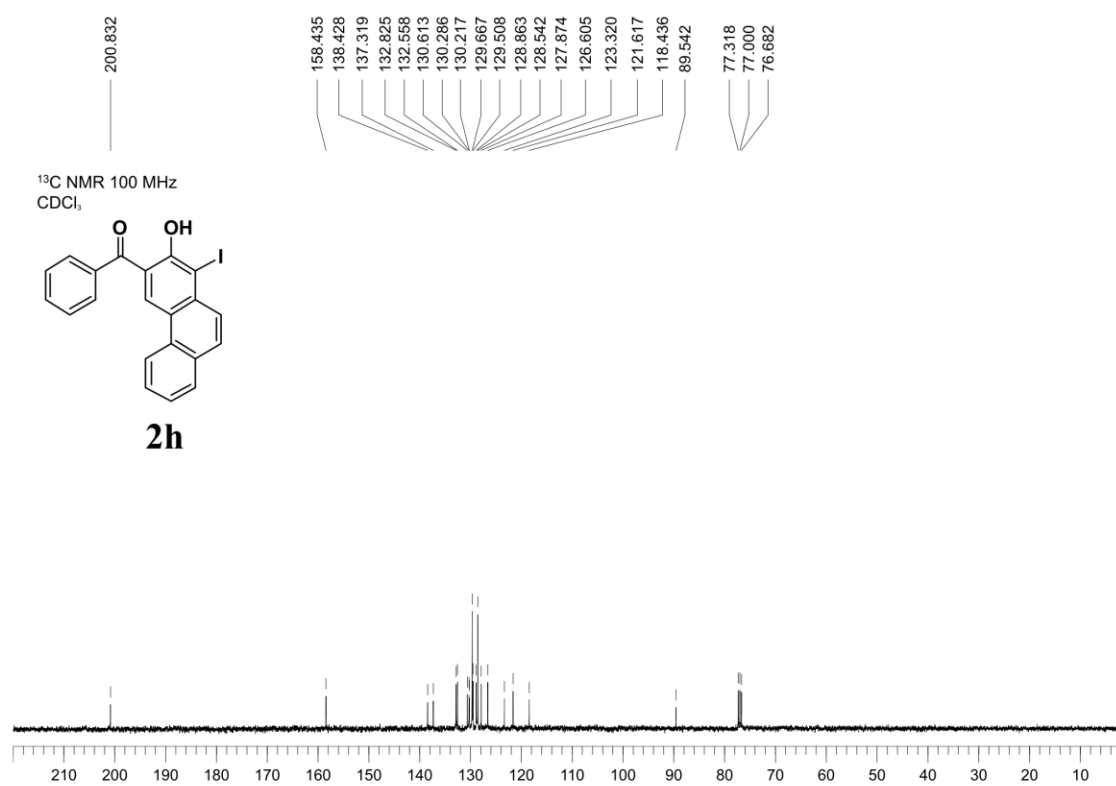

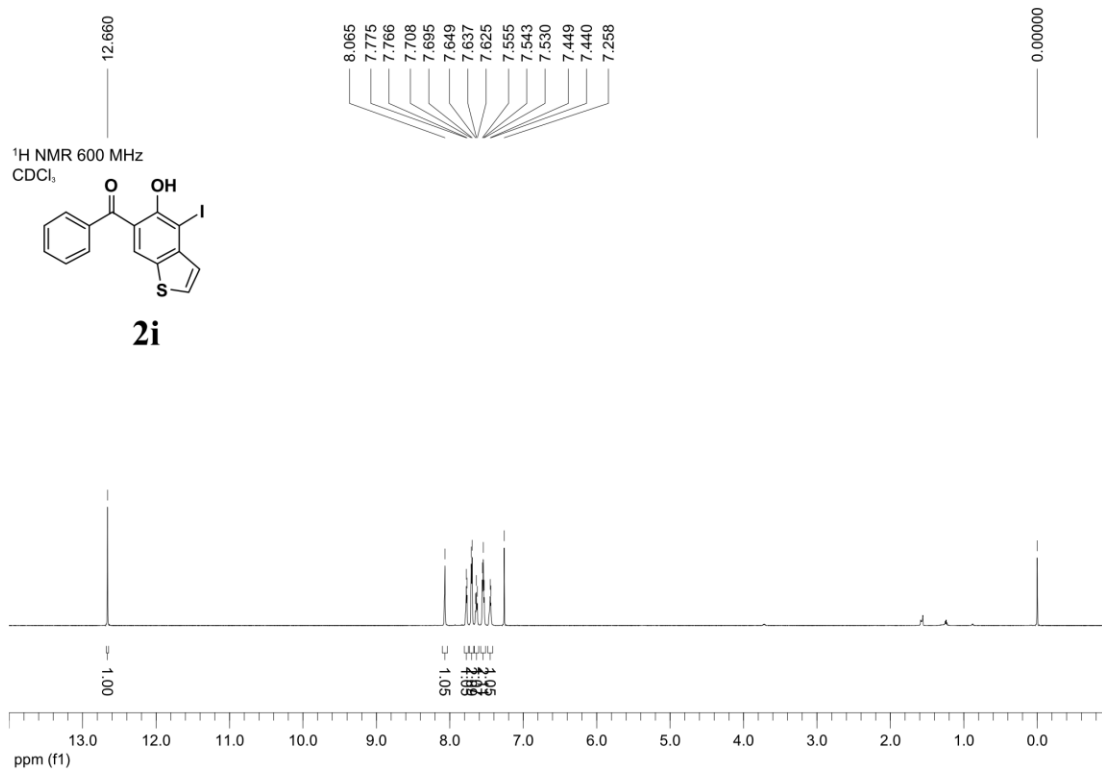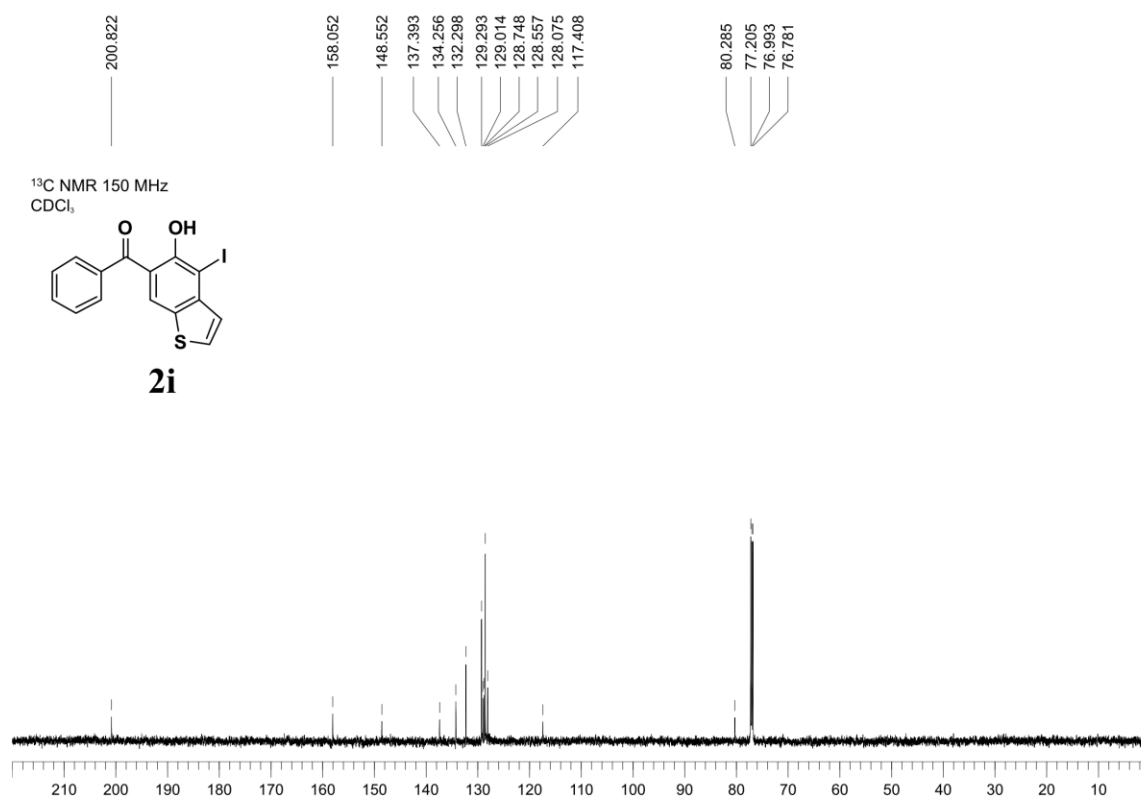



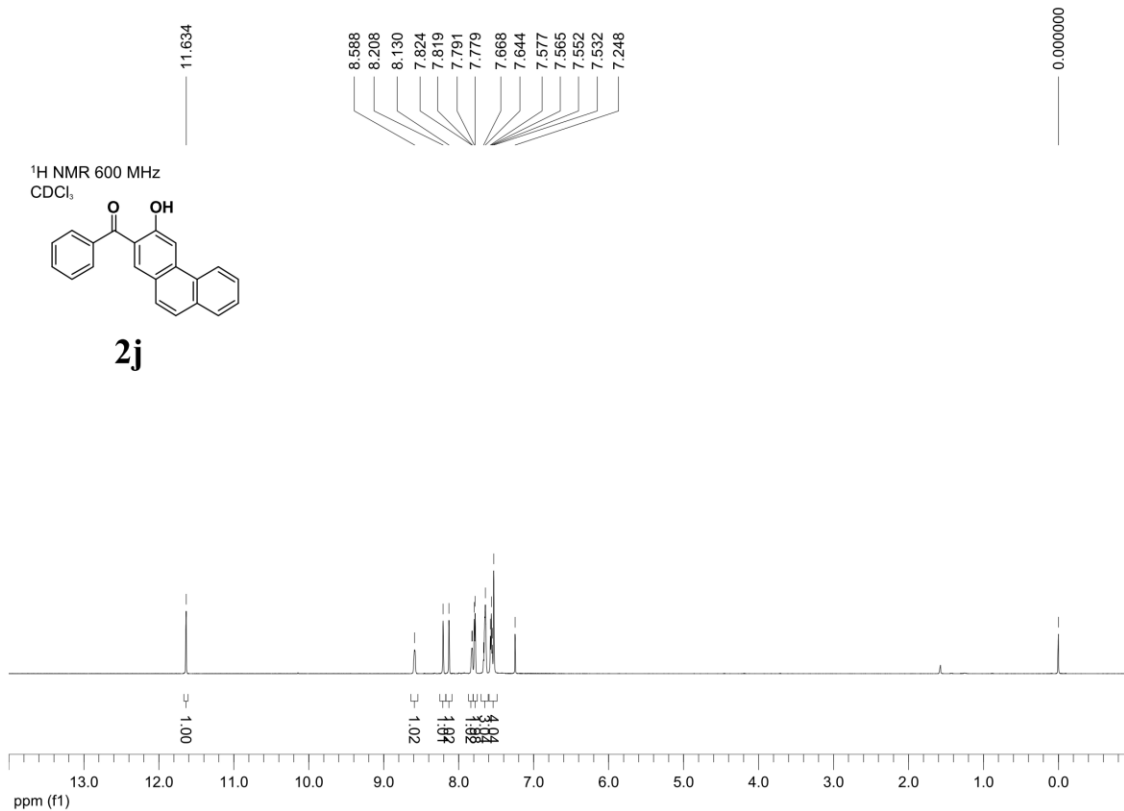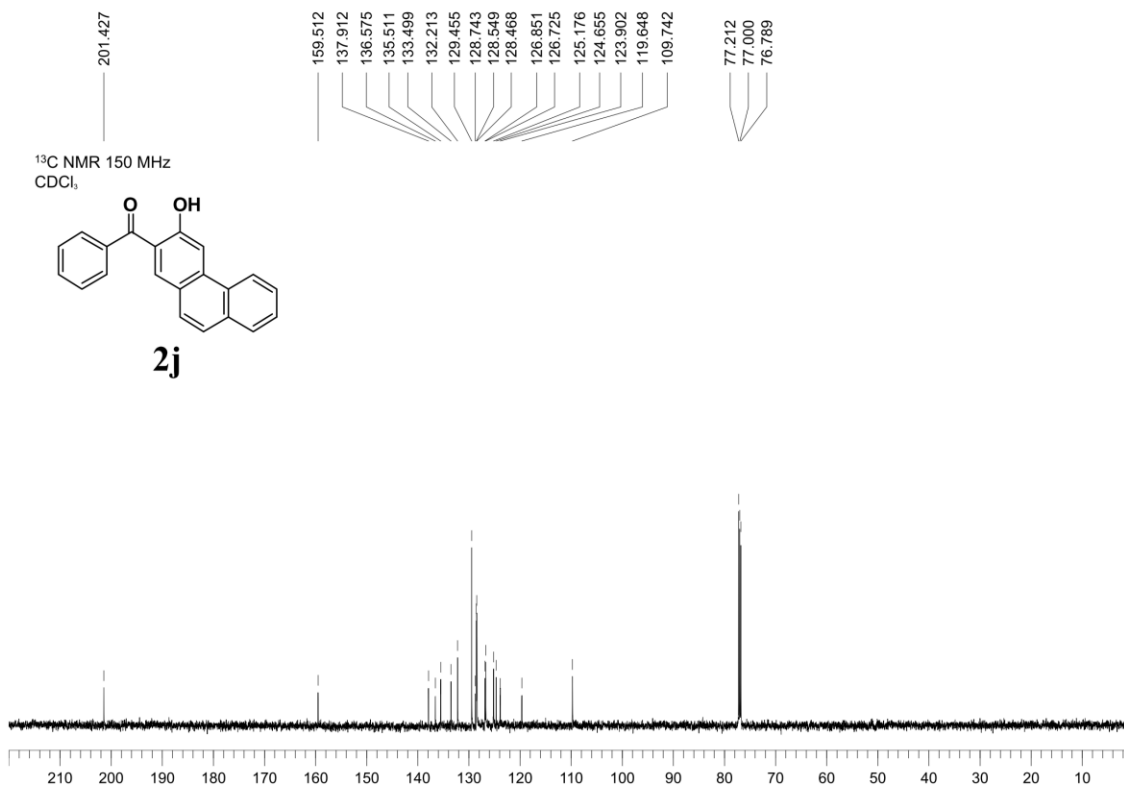

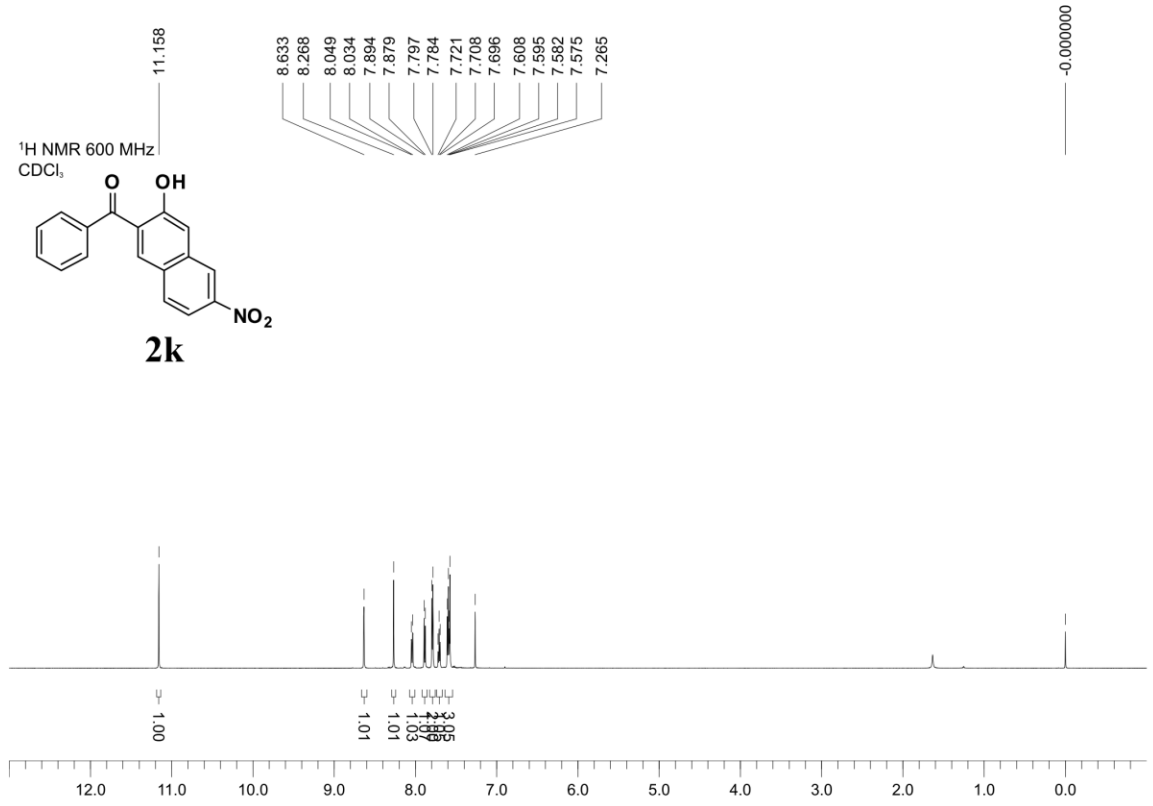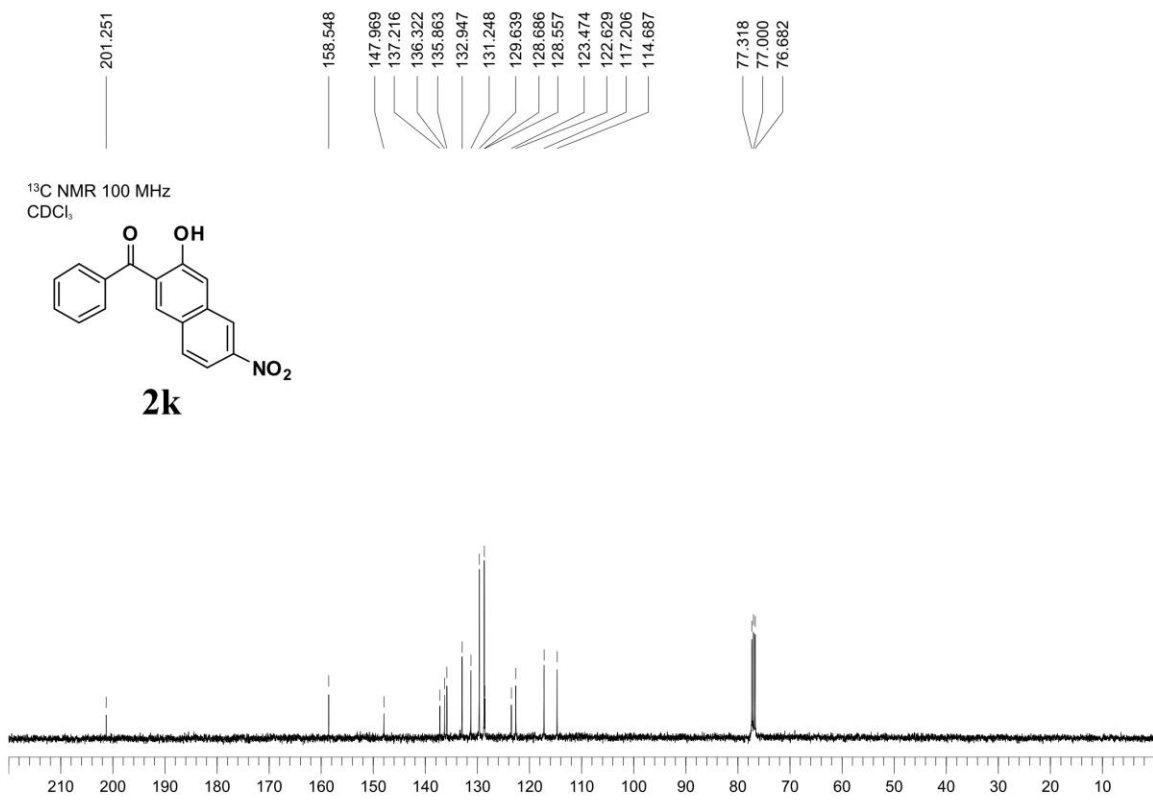

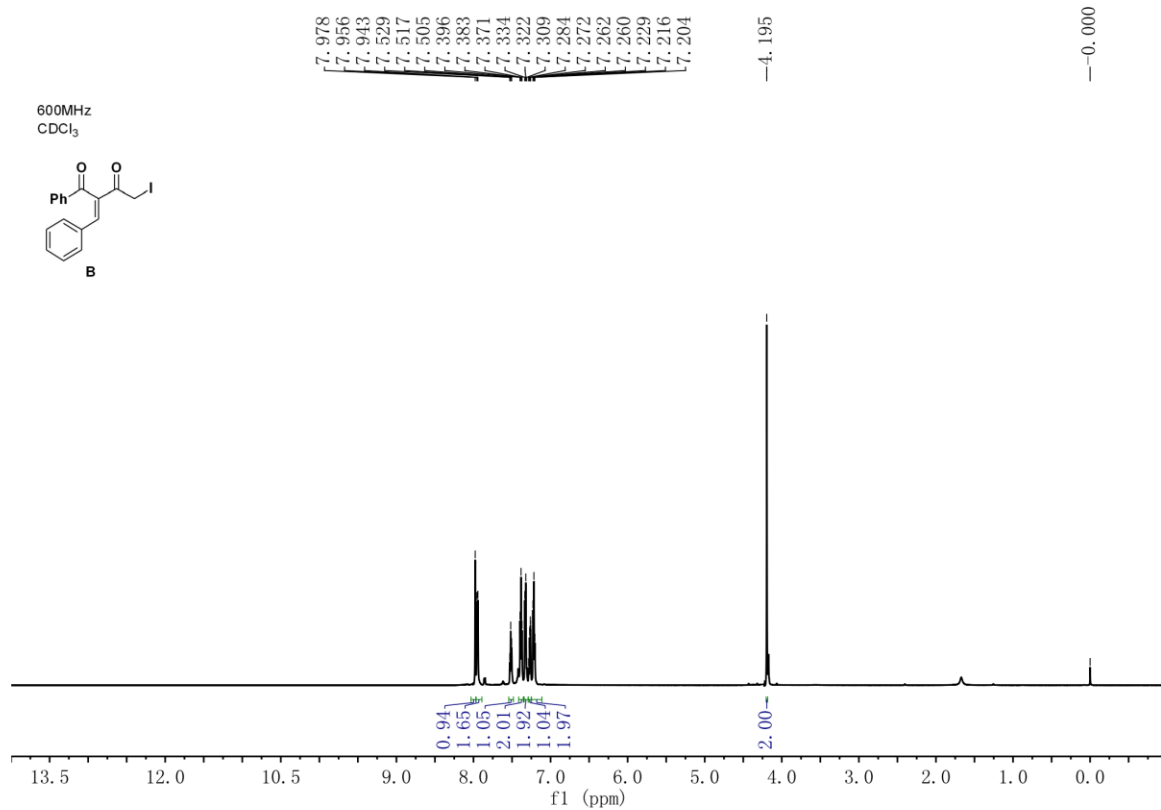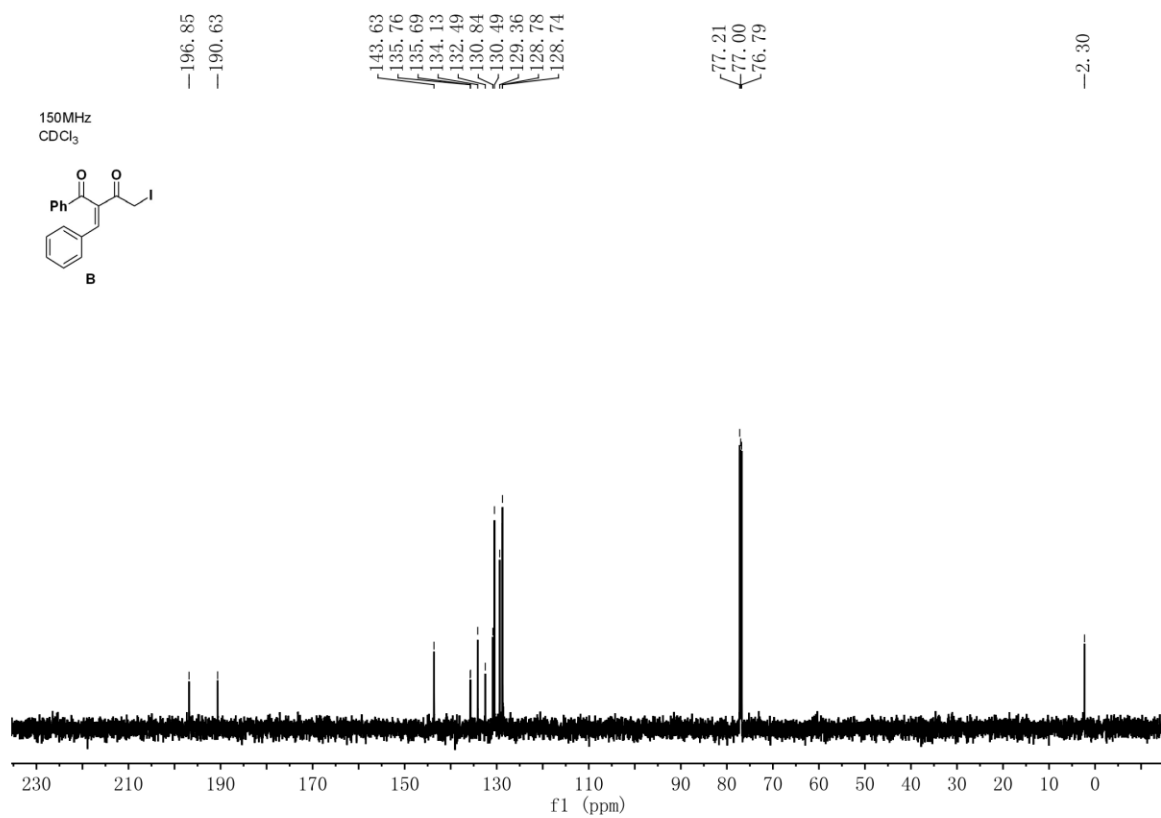

Supplement: c5ra17651d1.pdf [file c5ra17651d1.pdf]
